# Supplementary material
Source: MDPI journal article supplement (https://www.mdpi.com/2073-4441/12/7/1893)
Supplement: s1 [file s1]

*Supplementary Material*

# **Real-time behavior of a microalgae-bacteria consortium treating wastewater in Sequencing Batch Reactor in response to feeding time and agitation mode**

**Emna Mhedhbi <sup>1,\*</sup>, Nadia Khelifi <sup>1,2</sup>, Paola Foladori <sup>3</sup> and Issam Smaali <sup>1</sup>**

<sup>1</sup> LIP-MB Laboratory (LR11ES24), Department of Biological and Chemical Engineering -National Institute of Applied Sciences and Technology, University of Carthage, BP 676 Tunis cedex, Tunisia; khelifi.nad@gmail.com (N.K.); Issam.smaali@insat.rnu.tn (I.S.)

<sup>2</sup> Higher Institute of Fisheries and Aquaculture of Bizerte, University of Carthage, BP 15 Errimel 7080, Bizerte, Tunisia

<sup>3</sup> Department of Civil Environmental and Mechanical Engineering, University of Trento, Trento, 38122 Trento TN, Italy; paola.foladori@unitn.it.

\* Correspondence: emna.baka@gmail.com; Tel: +216-71-703-627; Fax: +216-71-704-329

Supplementary Material

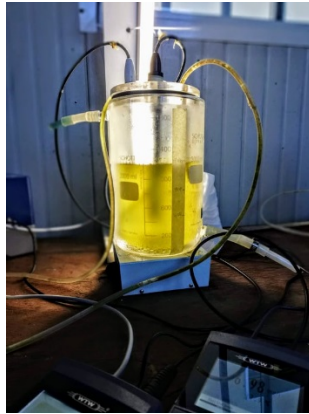

**Figure S1.** Photobioreactor (PBR) used for lab-scale microalgae-bacteria consortium culturing.

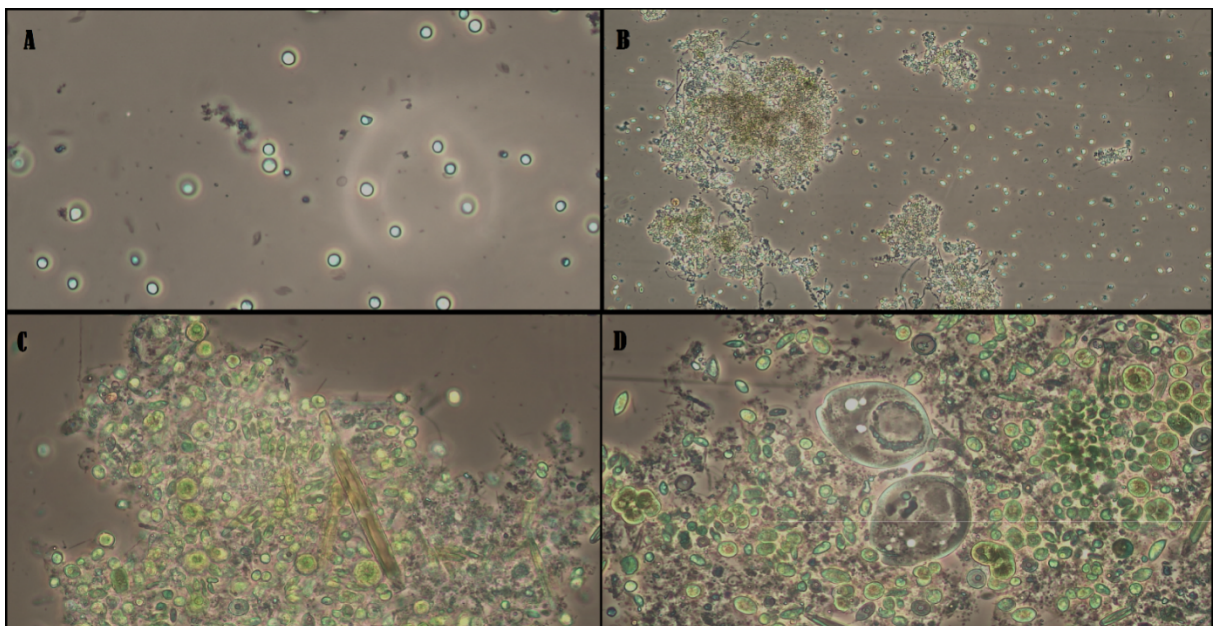

**Figure 2.** Microscopic observation of the consortium development.

- (A) Inoculum picture showing only *Nannochloropsis gaditana* (500 x).
- (B) Consortium resulted after 1 month of experimenting at 8 days HRT (125 x).
- (C) Consortium aged of 2 months resulted from the 8 and 6 d HRT (400 x).
- (D) The final consortium after 4 months of experimentations where different strains of microalgae, bacteria (protozoa...) have been developed (400 x).
